# Supplementary material
Source: JCI journal article supplement (doi:10.1172/jci203593)
Supplement: sd1 [file 1]

**Supplementary Figures and Tables:**

**Table S1. HLA typing of two healthy donors.**

| HLA type | Donor 1               | Donor 2                   |
|----------|-----------------------|---------------------------|
| HLA-A    | A01:01/04N;<br>A24:02 | A25:01;<br>A68:01         |
| HLA-B    | B44:05;<br>B52:01     | B44:02                    |
| HLA-C    | Cw02:02;<br>Cw12:02   | Cw05:01/03;<br>Cw07:04/11 |
| HLA-E    | 01:01;<br>01:03       | 01:01;<br>01:03           |

Figure S1

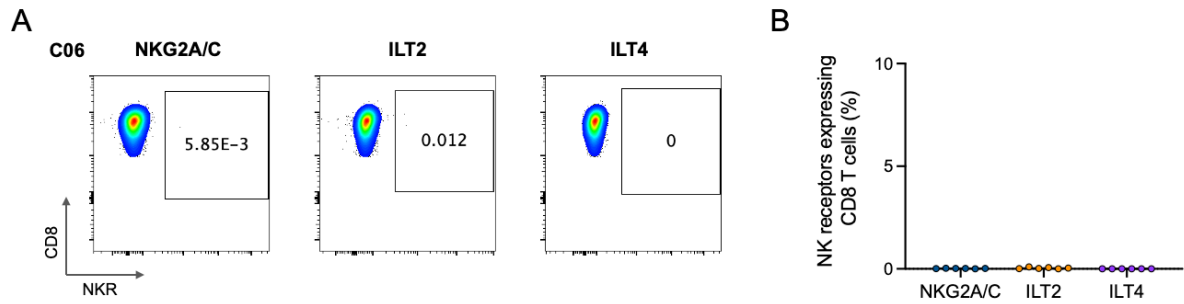

**Fig. S1. Identification of VL9 specificity and expression of NKG2A/C, ILT2 and ILT4 of all the T cell clones generated.**

**A,** Representative flow cytometry plots demonstrating the low level or lack of NK receptors (NKG2A/C, ILT2 and ILT4) staining on a T cell clone C06.

**B,** NKG2A/C, ILT2, and ILT4 expression demonstrated minimal expression of these receptors on all 6 clones, including clones C02, C06, C07, C10, C26, C27.

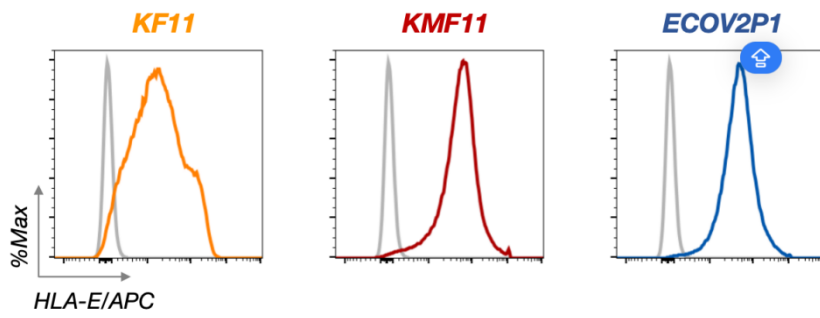

**Fig S2. Generation of HLA-E SCT transduced K562 cells as antigen presenting cells**

The flow charts represent the stable expression HLA-E in K562 cells transduced with SCTs containing the peptides KF11, KMF11 and ECOV2P1.

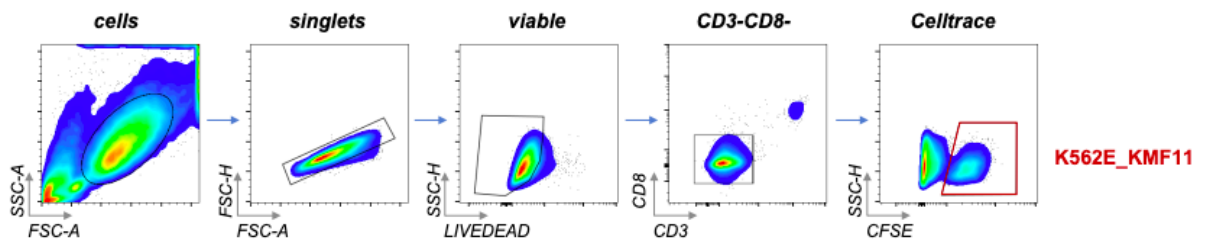

**Fig. S3. Gating strategy of coculture assays with K562E target cells**

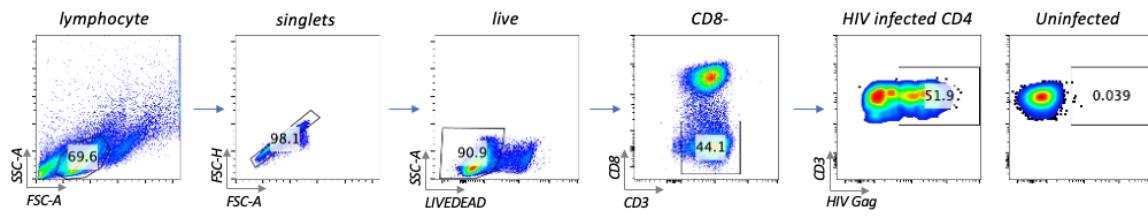

**Fig. S4. Gating strategy of HIV-infected CD4 T cells in a viral suppression assay**

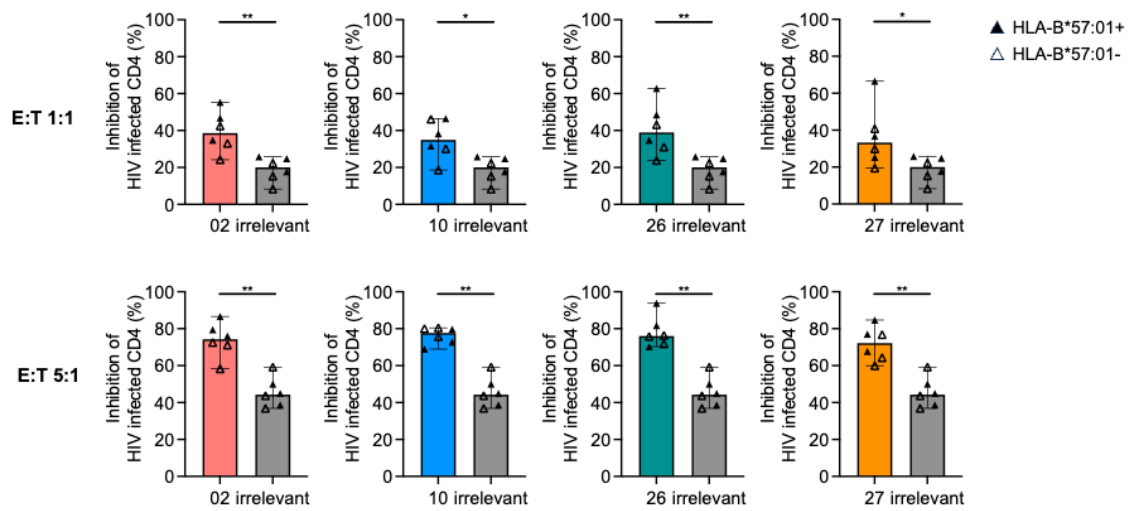

**Fig. S5. Antiviral effect of KMF11-HLA-E-specific TCR CD8 T cell transductants against HIV-infected primary CD4 T cells in a viral suppression assay.**

The inhibitory effect of KMF11-specific TCR transductants on HIV-infected CD4 T cells was assessed at E:T ratios of 1:1 and 5:1, shown in another two independent experiments. Data are represented as the median with a 95% Confidence Interval (CI) (n=6 donors). Statistical significance between KMF11 TCR transductants and irrelevant TCR controls was determined using the Mann Whitney test (\*p < 0.05, \*\*p < 0.01). Solid triangle indicates HLA-B\*57:01+ CD4 T cell donors, open triangle indicates HLA-B\*57:01- CD4 T cell donors.
